# Supplementary material for: Macroscopic assembly style of catalysts significantly determining their efficiency for converting CO2 to gasoline
Source: Royal Society of Chemistry journal article supplement (doi:10.1039/c9cy01470e), 2019-01-01
Supplement: c9cy01470e1.pdf [file c9cy01470e1.pdf]

**Supplementary information**

Macroscopic assembly style of catalysts significantly determining their efficiency for  
converting CO<sub>2</sub> to gasoline

Xiaoxing Wang<sup>a</sup>, Guohui Yang<sup>a,\*</sup>, Junfeng Zhang<sup>a</sup>, Faen Song<sup>a</sup>, Yingquan Wu<sup>a</sup>, Tao Zhang<sup>a</sup>, Qingde  
Zhang<sup>a</sup>, Noritatsu Tsubaki<sup>c</sup>, Yisheng Tan<sup>a,b,\*</sup>

<sup>a</sup> State Key Laboratory of Coal Conversion, Institute of Coal Chemistry, Chinese Academy of Sciences,  
Taiyuan 030001, China

<sup>b</sup> National Engineering Research Center for Coal-Based Synthesis, Institute of Coal Chemistry, Chinese  
Academy of Sciences, Taiyuan 030001, China

<sup>c</sup> Department of Applied Chemistry, School of Engineering, University of Toyama,  
Gofuku 3190, Toyama 930-8555, Japan

Table S1. Reaction performances of Fe–Zn–Zr@HZSM-5 core–shell catalysts with different SiO<sub>2</sub>/Al<sub>2</sub>O<sub>3</sub> molar ratios of HZSM-5 on CO<sub>2</sub> hydrogenation.

| Catalysts            | CO <sub>2</sub><br>conv.<br>(%) | Selectivity<br>(mol%) |      |      | Hydrocarbon<br>distribution (C-mol %) |                  |                 | I-C <sub>5+</sub><br>/C <sub>5+</sub> (%) | Aromatics<br>/C <sub>5+</sub> (%) |
|----------------------|---------------------------------|-----------------------|------|------|---------------------------------------|------------------|-----------------|-------------------------------------------|-----------------------------------|
|                      |                                 | CO                    | Oxy  | HC   | C <sub>1</sub>                        | C <sub>2-4</sub> | C <sub>5+</sub> |                                           |                                   |
| Fe–Zn–Zr@HZSM-5(38)  | 22.5                            | 42.0                  | 0.0  | 58.0 | 1.3                                   | 53.3             | 45.4            | 75.4                                      | 19.7                              |
| Fe–Zn–Zr@HZSM-5(50)  | 21.2                            | 42.8                  | 0.1  | 57.1 | 1.5                                   | 42.3             | 56.2            | 90.6                                      | 6.4                               |
| Fe–Zn–Zr@HZSM-5(100) | 22.5                            | 83.0                  | 14.7 | 2.3  | 69.2                                  | 20.3             | 10.5            | 87.6                                      | 0.0                               |
| Fe–Zn–Zr/HZSM-5(50)  | 19.7                            | 45.1                  | 0.0  | 54.9 | 1.4                                   | 55.0             | 43.6            | 74.4                                      | 19.9                              |

5.0 MPa; 340 °C; 6 h; 3000 ml/g/h; H<sub>2</sub>/CO<sub>2</sub>/N<sub>2</sub>=72/24/4; Fe–Zn–Zr:HZSM-5=4:1 (weight ratio).

Oxy=oxygen compounds (MeOH+Me<sub>2</sub>O); HC=hydrocarbon.

I-C<sub>5+</sub>=C<sub>5+</sub> isoalkanes; C<sub>5+</sub>=C<sub>5+</sub> hydrocarbons.

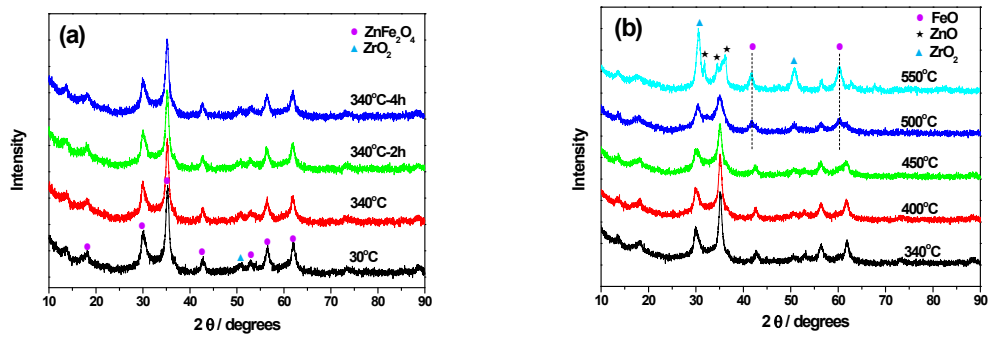

Fig. S1. In situ XRD patterns of Fe–Zn–Zr core. (a) Reduced at 340 °C with different time, (b) Reduced at different temperature and keep 0.5 h.

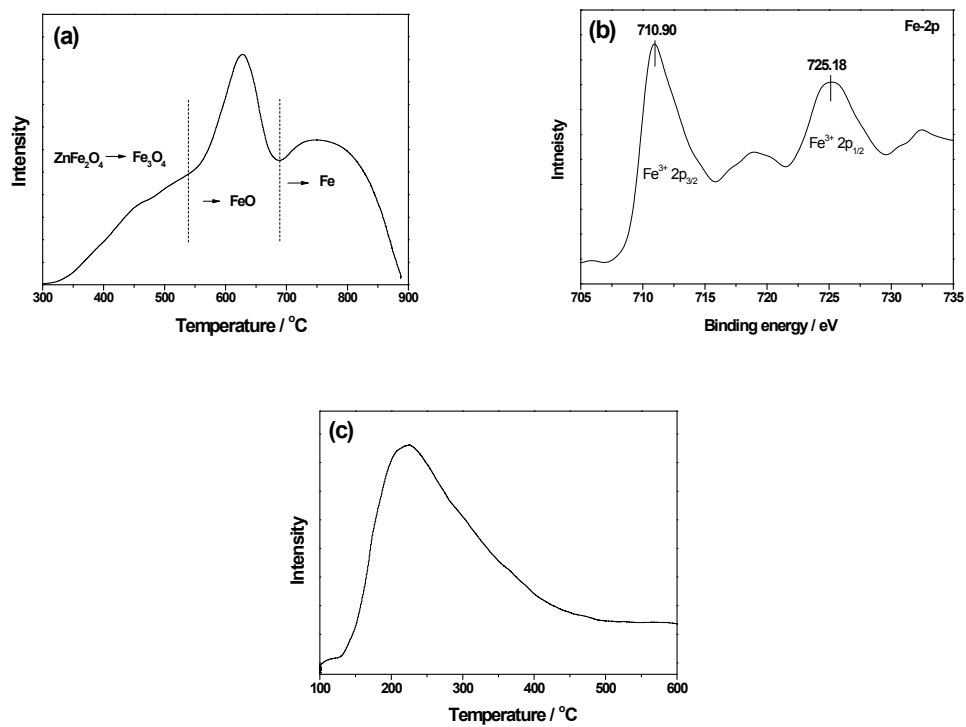

Fig. S2. (a) H<sub>2</sub>-TPR (b) XPS, and (c) NH<sub>3</sub>-TPD profiles of Fe-Zn-Zr core.

Table S2. Peak areas integrated from NH<sub>3</sub>-TPD profiles of the different samples.

| Samples                           | Total acid sites <sup>a</sup> (μmol/g) | Weak acid sites <sup>b</sup> (μmol/g) | Mediate acid sites <sup>b</sup> (μmol/g) | Strong acid sites <sup>b</sup> (μmol/g) |
|-----------------------------------|----------------------------------------|---------------------------------------|------------------------------------------|-----------------------------------------|
| Fe-Zn-Zr                          | 93.5                                   | 28.4                                  | 65.1                                     | 0.0                                     |
| HZSM-5(100)                       | 69.7                                   | 36.1                                  | 0.0                                      | 33.6                                    |
| HZSM-5(50)                        | 280.9                                  | 152.5                                 | 0.0                                      | 128.4                                   |
| HZSM-5(38)                        | 440.0                                  | 237.4                                 | 0.0                                      | 202.6                                   |
| Fe-Zn-Zr@HZSM-5(100) <sup>c</sup> | 55.3                                   | 12.7                                  | 28.4                                     | 14.2                                    |
| Fe-Zn-Zr@HZSM-5(50) <sup>c</sup>  | 86.8                                   | 29.7                                  | 30.1                                     | 27.0                                    |
| Fe-Zn-Zr@HZSM-5(38) <sup>c</sup>  | 92.0                                   | 35.6                                  | 24.1                                     | 32.3                                    |
| Fe-Zn-Zr/HZSM-5(50) <sup>c</sup>  | 107.7                                  | 45.0                                  | 24.7                                     | 38.0                                    |

<sup>a</sup> Determined by NH<sub>3</sub>-TPD.

<sup>b</sup> Quantified by deconvolution of the NH<sub>3</sub>-TPD profiles with Gaussian peaks ( $R^2 > 0.99$ ).

<sup>c</sup> Fe-Zn-Zr:HZSM-5=4:1(weight ratio)

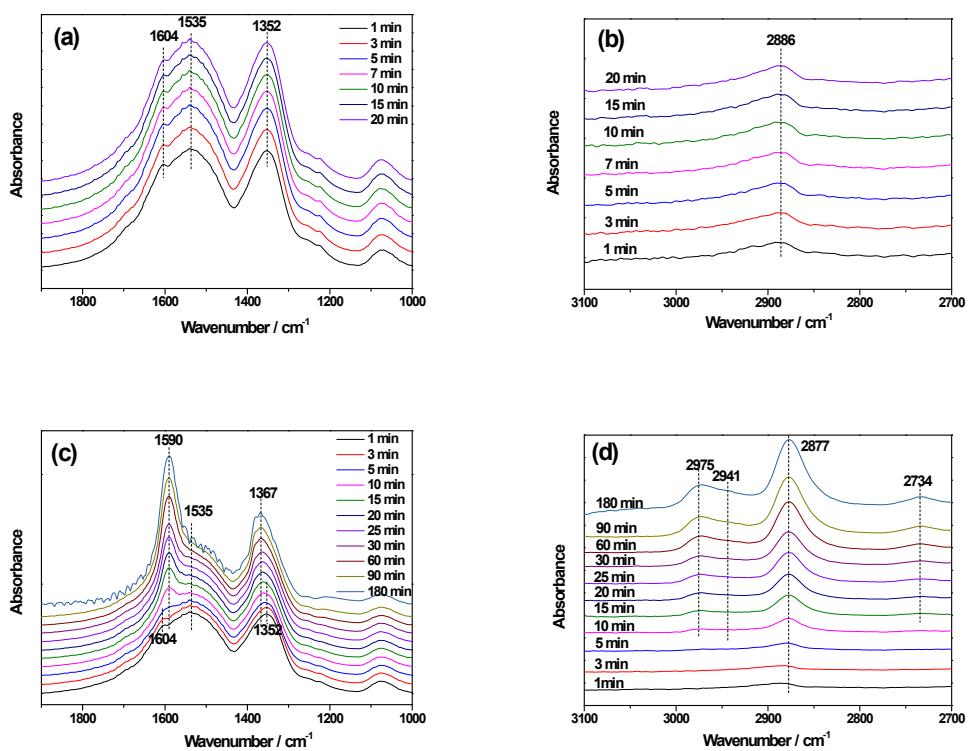

Fig. S3. In situ DRIFT spectra of (a,b) CO<sub>2</sub> adsorption and (c,d) CO<sub>2</sub> hydrogenation on Fe-Zn-Zr core.

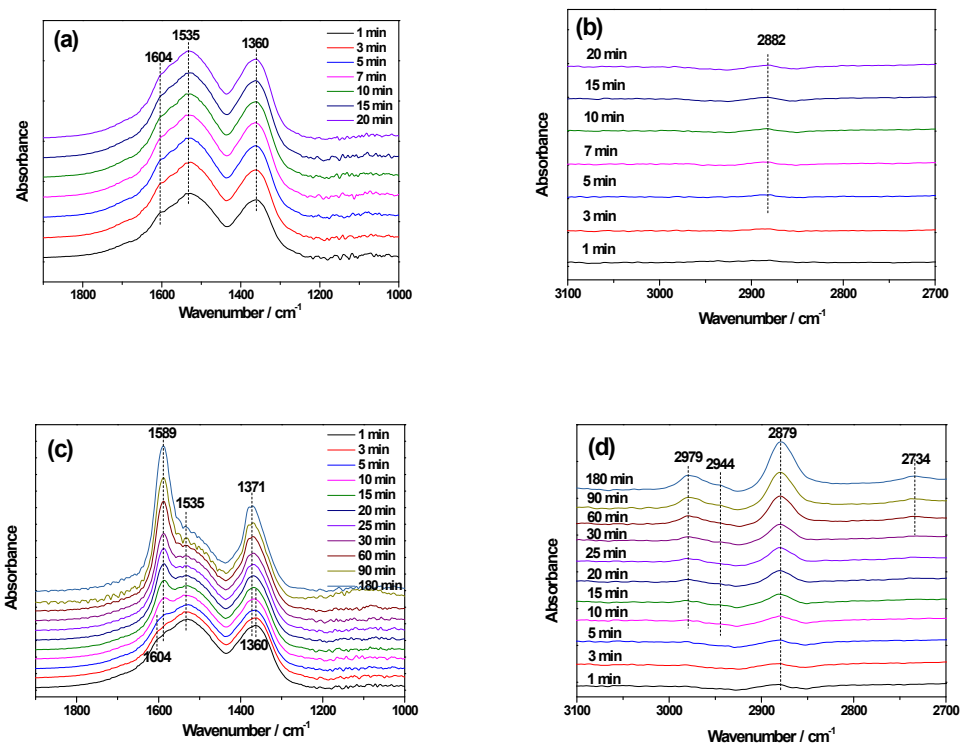

Fig. S4. In situ DRIFT spectra of (a,b) CO<sub>2</sub> adsorption and (c,d) CO<sub>2</sub> hydrogenation on Fe-Zn-Zr@HZSM-5(50) core-shell catalyst with Fe-Zn-Zr and HZSM-5 weight ratio of 6:1.

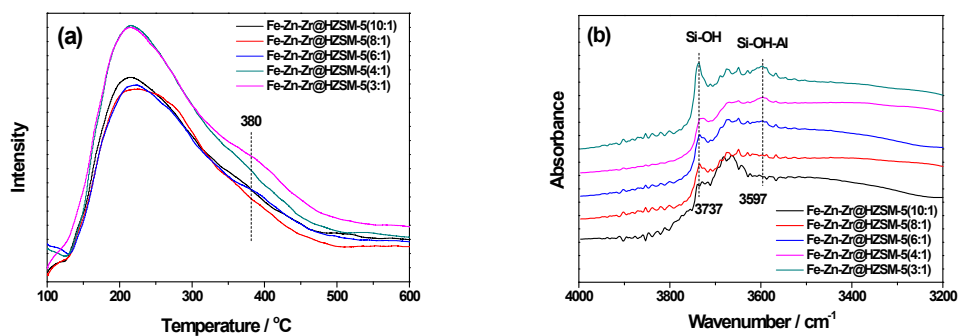

Fig. S5. NH<sub>3</sub>-TPD profiles (a) and DRIFT spectra in the OH stretching region (b) of Fe-Zn-Zr@HZSM-5(50) core-shell catalysts with different Fe-Zn-Zr and HZSM-5 weight ratios.



Table S3. Bulk contents and peak areas integrated from NH<sub>3</sub>-TPD profiles of Fe–Zn–Zr@HZSM-5(50) core–shell catalysts with different Fe–Zn–Zr and HZSM-5 weight ratios.

| Samples               | Fe–Zn–Zr:HZSM-5<br>(weight ratio) <sup>a</sup> | Total acid<br>Sites <sup>b</sup><br>(μmol/g) | Weak acid<br>Sites <sup>c</sup><br>(μmol/g) | Mediate<br>acid<br>Sites <sup>c</sup><br>(μmol/g) | Strong acid<br>Sites <sup>c</sup><br>(μmol/g) |
|-----------------------|------------------------------------------------|----------------------------------------------|---------------------------------------------|---------------------------------------------------|-----------------------------------------------|
| Fe–Zn–Zr@HZSM-5(10:1) | 17.3:1                                         | 73.0                                         | 19.8                                        | 33.9                                              | 19.3                                          |
| Fe–Zn–Zr@HZSM-5(8:1)  | 14.7:1                                         | 72.0                                         | 19.6                                        | 32.1                                              | 20.3                                          |
| Fe–Zn–Zr@HZSM-5(6:1)  | 13.3:1                                         | 64.1                                         | 21.9                                        | 20.7                                              | 21.5                                          |
| Fe–Zn–Zr@HZSM-5(4:1)  | 7.9:1                                          | 86.8                                         | 29.7                                        | 30.1                                              | 27.0                                          |
| Fe–Zn–Zr@HZSM-5(3:1)  | 6.3:1                                          | 95.7                                         | 34.2                                        | 24.2                                              | 37.3                                          |

<sup>a</sup> Determined by ICP.

<sup>b</sup> Determined by NH<sub>3</sub>-TPD.

<sup>c</sup> Quantified by deconvolution of the NH<sub>3</sub>-TPD profiles with Gaussian peaks ( $R^2 > 0.99$ ).

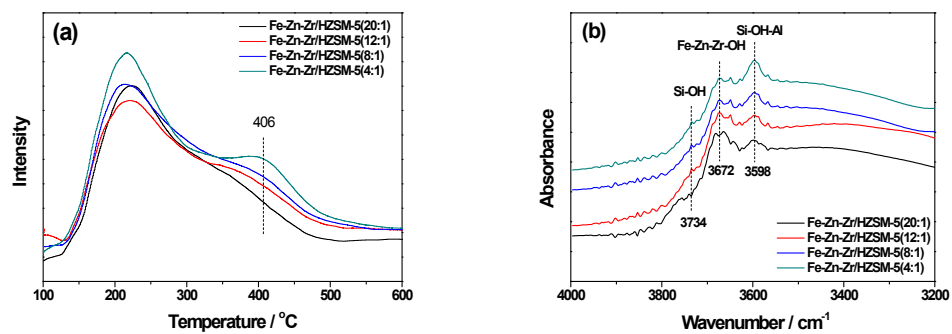

Fig. S6. NH<sub>3</sub>-TPD profiles (a) and DRIFT spectra in the OH stretching region (b) of Fe-Zn-Zr/HZSM-5(50) granular-mixing catalysts with different Fe-Zn-Zr and HZSM-5 weight ratios.

Table S4. Peak areas integrated from NH<sub>3</sub>-TPD profiles of Fe–Zn–Zr/HZSM-5(50) granular-mixing catalysts with different Fe–Zn–Zr and HZSM-5 weight ratios.

| Samples               | Total acid sites <sup>a</sup> (μmol/g) | Weak acid sites <sup>b</sup> (μmol/g) | Mediate acid sites <sup>b</sup> (μmol/g) | Strong acid sites <sup>b</sup> (μmol/g) |
|-----------------------|----------------------------------------|---------------------------------------|------------------------------------------|-----------------------------------------|
| Fe–Zn–Zr/HZSM-5(20:1) | 90.5                                   | 29.1                                  | 34.8                                     | 26.6                                    |
| Fe–Zn–Zr/HZSM-5(12:1) | 77.6                                   | 28.2                                  | 18.8                                     | 30.6                                    |
| Fe–Zn–Zr/HZSM-5(8:1)  | 91.8                                   | 29.7                                  | 27.7                                     | 34.4                                    |
| Fe–Zn–Zr/HZSM-5(4:1)  | 107.7                                  | 45.0                                  | 24.7                                     | 38.0                                    |

<sup>a</sup> Determined by NH<sub>3</sub>-TPD.

<sup>b</sup> Quantified by deconvolution of the NH<sub>3</sub>-TPD profiles with Gaussian peaks ( $R^2 > 0.99$ ).

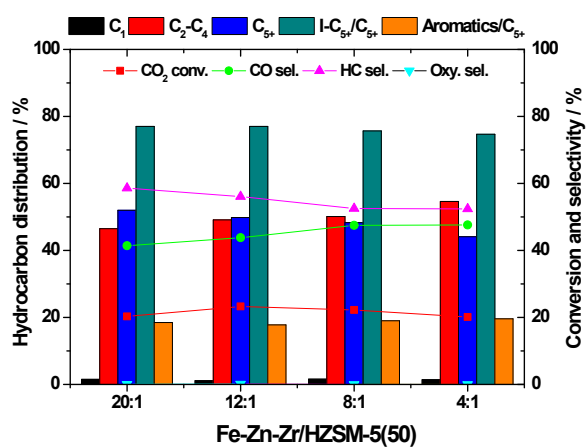

Fig. S7. CO<sub>2</sub> conversion and hydrocarbon distribution of CO<sub>2</sub> hydrogenation to gasoline over Fe–Zn–Zr/HZSM-5(50) granular–mixing catalysts with different Fe–Zn–Zr and HZSM-5 weight ratios. (Reaction conditions: 5.0 MPa; 340 °C; 2 h; 3000 ml/g/h; H<sub>2</sub>/CO<sub>2</sub>/N<sub>2</sub>=72/24/4.)

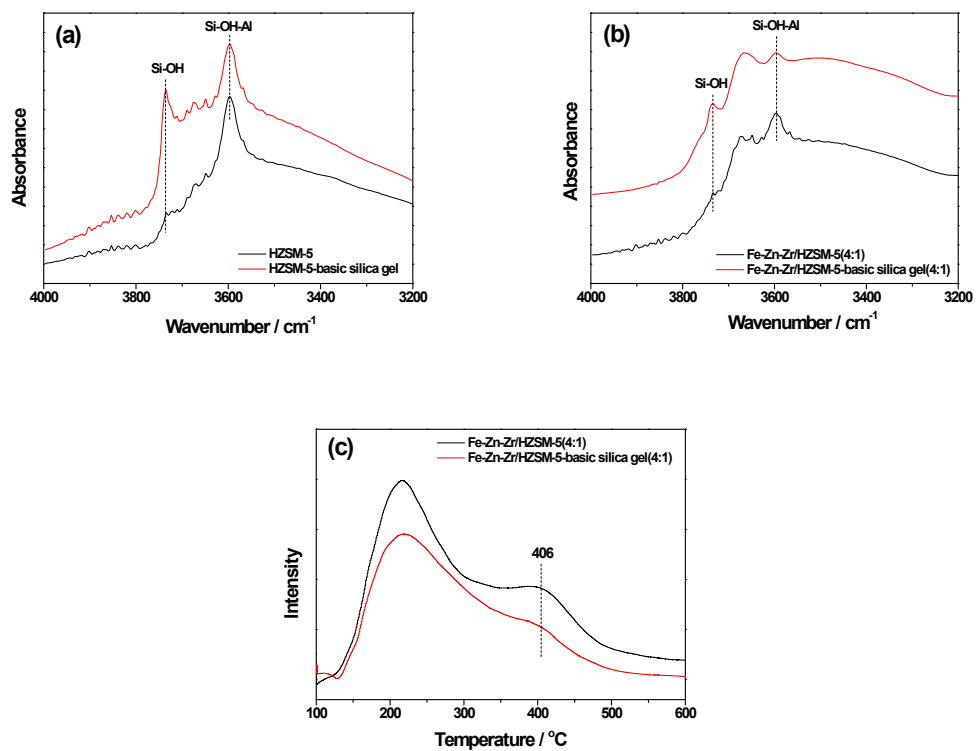

Fig. S8. Characterizations of HZSM-5(50) zeolite and Fe-Zn-Zr/HZSM-5(4:1) granular-mixing catalysts with  $\text{SiO}_2/\text{Al}_2\text{O}_3$  of 50 before and after soaking by basic silica gel: (a, b) DRIFT spectra in the OH stretching region, (c)  $\text{NH}_3$ -TPD profiles.

Table S5. Peak areas integrated from NH<sub>3</sub>-TPD profiles of Fe–Zn–Zr/HZSM-5(50) granular–mixing catalysts before and after soaking by basic silica gel.

| Samples                               | Total acid sites <sup>a</sup> (μmol/g) | Weak acid sites <sup>b</sup> (μmol/g) | Mediate acid sites <sup>b</sup> (μmol/g) | Strong acid sites <sup>b</sup> (μmol/g) |
|---------------------------------------|----------------------------------------|---------------------------------------|------------------------------------------|-----------------------------------------|
| Fe–Zn–Zr/HZSM-5(4:1)                  | 107.7                                  | 45.0                                  | 24.7                                     | 38.0                                    |
| Fe–Zn–Zr/HZSM-5-basic silica gel(4:1) | 77.6                                   | 28.5                                  | 19.2                                     | 29.9                                    |

<sup>a</sup> Determined by NH<sub>3</sub>-TPD.

<sup>b</sup> Quantified by deconvolution of the NH<sub>3</sub>-TPD profiles with Gaussian peaks ( $R^2 > 0.99$ ).

Table S6. Reaction performances of Fe–Zn–Zr@HZSM-5(50) core–shell catalyst (Fe–Zn–Zr:HZSM-5=6:1) on CO<sub>2</sub> hydrogenation.

| Space velocity (mL/g/h) | CO <sub>2</sub> conv.(%) | Selectivity (C-mol%) |     |      | Hydrocarbon distribution (C-mol %) |                                |                 | I-C <sub>5+</sub> /C <sub>5+</sub> (%) | Aromatics/C <sub>5+</sub> (%) |
|-------------------------|--------------------------|----------------------|-----|------|------------------------------------|--------------------------------|-----------------|----------------------------------------|-------------------------------|
|                         |                          | CO                   | Oxy | HC   | C <sub>1</sub>                     | C <sub>2</sub> -C <sub>4</sub> | C <sub>5+</sub> |                                        |                               |
| 3000                    | 22.8                     | 39.1                 | 0.1 | 60.9 | 2.2                                | 39.8                           | 58.0            | 91.5                                   | 6.0                           |
| 20000                   | 12.3                     | 34.3                 | 5.0 | 60.7 | 2.4                                | 44.0                           | 53.7            | 89.6                                   | 7.1                           |

5.0 MPa; 340 °C; 2 h; H<sub>2</sub>/CO<sub>2</sub>/N<sub>2</sub>=72/24/4.

Oxy=oxygen compounds (MeOH+Me<sub>2</sub>O); HC=hydrocarbon.

I-C<sub>5+</sub>=C<sub>5+</sub> isoalkanes; C<sub>5+</sub>=C<sub>5+</sub> hydrocarbons.

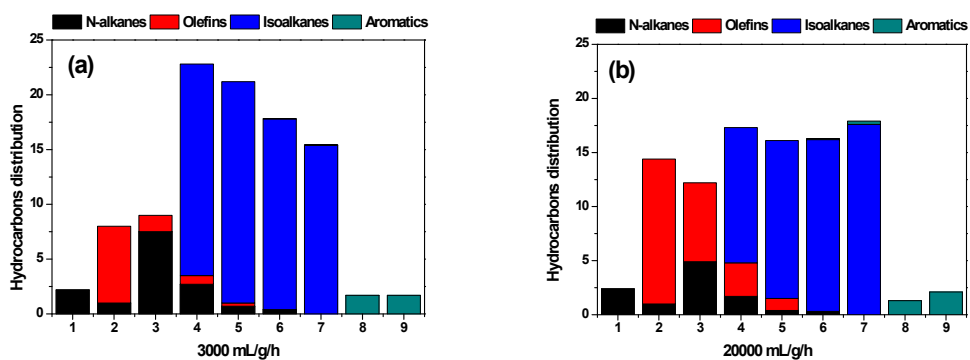

Fig. S9. Hydrocarbon distribution of Fe-Zn-Zr@HZSM-5(50) core-shell catalyst (Fe-Zn-Zr:HZSM-5=6:1) on CO<sub>2</sub> hydrogenation with different space velocity. (a) 3000 mL/g/h, (b) 20000 mL/g/h.



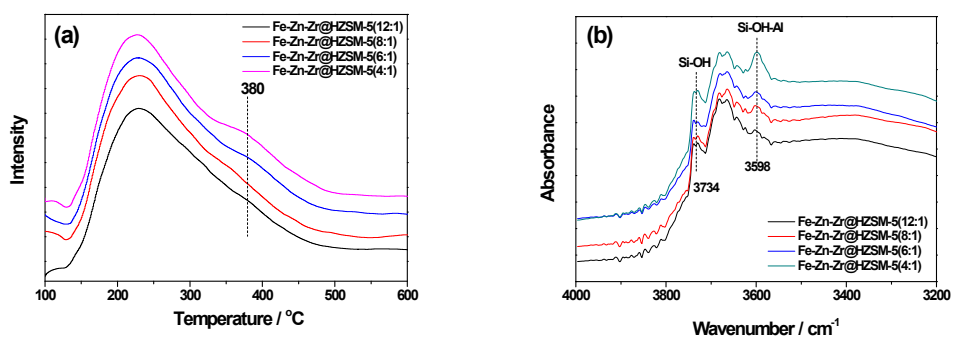

Fig. S10. NH<sub>3</sub>-TPD profiles (a) and DRIFT spectra in the OH stretching region (b) of Fe-Zn-Zr@HZSM-5(38) core-shell catalysts with different Fe-Zn-Zr and HZSM-5 weight ratios.

Table S7. Peak areas integrated from NH<sub>3</sub>-TPD profiles of Fe–Zn–Zr@HZSM-5(38 ) core–shell catalysts with different Fe–Zn–Zr and HZSM-5 weight ratios.

| Samples               | Total acid sites <sup>a</sup> (μmol/g) | Weak acid sites <sup>b</sup> (μmol/g) | Mediate acid sites <sup>b</sup> (μmol/g) | Strong acid sites <sup>b</sup> (μmol/g) |
|-----------------------|----------------------------------------|---------------------------------------|------------------------------------------|-----------------------------------------|
| Fe–Zn–Zr@HZSM-5(12:1) | 89.1                                   | 34.2                                  | 32.8                                     | 22.1                                    |
| Fe–Zn–Zr@HZSM-5(8:1)  | 83.5                                   | 29.1                                  | 31.5                                     | 22.9                                    |
| Fe–Zn–Zr@HZSM-5(6:1)  | 88.5                                   | 27.2                                  | 33.3                                     | 28.0                                    |
| Fe–Zn–Zr@HZSM-5(4:1)  | 92.0                                   | 35.6                                  | 24.1                                     | 32.3                                    |

<sup>a</sup> Determined by NH<sub>3</sub>-TPD.

<sup>b</sup> Quantified by deconvolution of the NH<sub>3</sub>-TPD profiles with Gaussian peaks ( $R^2 > 0.99$ ).
